# Supplementary material
Source: MDPI journal article supplement (https://www.mdpi.com/1424-8247/17/5/648)
Supplement: s1 [file s1]

# Enzymatic metabolic switches of astrocyte response to lipotoxicity as potential therapeutic targets for neurodegenerative diseases

## Pharmaceuticals - Supplementary Material

### Supplementary tables

**Table S1.** Biological processes, Cellular components and Metabolic pathways terms enriched in proteins functionally related to Metabolic Switches. Table S1 describes the enriched terms in the proteins functionally related to Metabolic Switches in Sec. 2.1.1.

The table S1 corresponds to the excel file “Table S1.xlsx”

**Table S2.** OpenTargetDB association scores of neurodegenerative diseases to five MS indirectly regulated by ChEMBL nervous system drugs. Table S2 describes the neurodegenerative disease association scores for the five MSs mentioned in Sec. 2.1.2.

| MSs UniProt ID | Related to neurodegenerative disease? | Open target database score* |         |         |         |             |             |         |         |
|----------------|---------------------------------------|-----------------------------|---------|---------|---------|-------------|-------------|---------|---------|
|                |                                       | OAS                         | GA      | SM      | D       | PSB         | TM          | RE      | AM      |
| P00558         | Yes                                   | 0.51328866                  | No data | No data | No data | 0.843712939 | 0.012158616 | No data | No data |
| P04406         | Yes                                   | 0.552948973                 | No data | No data | No data | 0.899017406 | 0.210833353 | No data | No data |
| P09110         | Yes°                                  | 0.074839921                 | No data | No data | No data | No data     | 0.615529933 | No data | No data |
| O76062         | Yes°                                  | 0.001478319                 | No data | No data | No data | No data     | 0.012158616 | No data | No data |
| Q08426         | -                                     | -                           | No data | No data | No data | No data     | No data     | No data | No data |

\*According to the "neurodegenerative disease" score. If there was none (°), it corresponded to the nervous system disease with the highest score.

**OAS:** Overall Association Score, **GA:** Genetic Associations, **SM:** Somatic Mutations, **D:** drugs, **PSB:** Pathways Systems Biology, **TM:** Text Mining; **RE:** RNA Expression; **AM:** Animal Models.

## Supplementary Material

**Table S3.** Description of the 32 nervous-system drugs associated with a single target in the PPI network.  
Table S3 describes the 32 drugs with a single target in the DPI network in Sec. 2.1.2.

| Drug name<br>(ChEMBL ID) | Drug related to neurodegenerative disease treatment | ID UniProt<br>Target | Targets  | Metabolic Switch<br>Related |
|--------------------------|-----------------------------------------------------|----------------------|----------|-----------------------------|
| CHEMBL95                 | Anticholinesterases                                 | P05067               | APP      | GAPDH                       |
| CHEMBL1094               | Other antiepileptics                                | P14618               | PKM      | PGK1, GAPDH                 |
| CHEMBL53                 | Dopamine agonist                                    | Q99714               | HSD17B10 | EHHADH, ACAA1               |
| CHEMBL1009               | Dopa and dopa derivatives                           | Q99714               | HSD17B10 | EHHADH, ACAA1               |
| CHEMBL1201236            | Anti-Parkinson drugs                                | Q99714               | HSD17B10 | EHHADH, ACAA1               |
| CHEMBL415                | Non-selective monoamine reuptake inhibitors         | Q99720               | SIGMAR1  | TM7FS2                      |
| CHEMBL41                 | Selective serotonin reuptake inhibitors             | Q99720               | SIGMAR1  | TM7FS2                      |
| CHEMBL49                 | Azaspirodecanedione derivatives                     | Q99720               | SIGMAR1  | TM7FS2                      |
| CHEMBL479                | Phenothiazines with piperidine structure            | Q99720               | SIGMAR1  | TM7FS2                      |
| CHEMBL71                 | Phenothiazines with aliphatic side-chain            | Q99720               | SIGMAR1  | TM7FS2                      |
| CHEMBL502                | Anticholinesterases                                 | Q99720               | SIGMAR1  | TM7FS2                      |
| CHEMBL14376              | Other antipsychotics                                | Q99720               | SIGMAR1  | TM7FS2                      |
| CHEMBL549                | Selective serotonin reuptake inhibitors             | Q99720               | SIGMAR1  | TM7FS2                      |
| CHEMBL564                | Phenothiazines with aliphatic side-chain            | Q99720               | SIGMAR1  | TM7FS2                      |
| CHEMBL596                | Opioid anesthetic/ Phenylpiperidine derivatives     | Q99720               | SIGMAR1  | TM7FS2                      |
| CHEMBL621                | Other antidepressants                               | Q99720               | SIGMAR1  | TM7FS2                      |
| CHEMBL629                | Non-selective monoamine reuptake inhibitors         | Q99720               | SIGMAR1  | TM7FS2                      |
| CHEMBL22242              | Benzamides                                          | Q99720               | SIGMAR1  | TM7FS2                      |
| CHEMBL660                | Adamantane derivatives                              | Q99720               | SIGMAR1  | TM7FS2                      |
| CHEMBL698                | Esters of aminobenzoic aci                          | Q99720               | SIGMAR1  | TM7FS2                      |
| CHEMBL716                | Diazepines, oxazepines, thiazepines and oxepines    | Q99720               | SIGMAR1  | TM7FS2                      |
| CHEMBL726                | Phenothiazines with piperazine structure            | Q99720               | SIGMAR1  | TM7FS2                      |

## Supplementary Material

|               |                                            |        |         |        |
|---------------|--------------------------------------------|--------|---------|--------|
| CHEMBL728     | Phenothiazines with piperazine structure   | Q99720 | SIGMAR1 | TM7FS2 |
| CHEMBL30008   | Antivertigo preparations                   | Q99720 | SIGMAR1 | TM7FS2 |
| CHEMBL809     | Selective serotonin reuptake inhibitors    | Q99720 | SIGMAR1 | TM7FS2 |
| CHEMBL814     | Selective serotonin reuptake inhibitors    | Q99720 | SIGMAR1 | TM7FS2 |
| CHEMBL43064   | Antivertigo preparation                    | Q99720 | SIGMAR1 | TM7FS2 |
| CHEMBL52440   | Other nervous system drugs                 | Q99720 | SIGMAR1 | TM7FS2 |
| CHEMBL1490    | Tertiary amines                            | Q99720 | SIGMAR1 | TM7FS2 |
| CHEMBL485253  | Ergot alkaloids                            | Q99720 | SIGMAR1 | TM7FS2 |
| CHEMBL1201203 | Ethers of tropine or tropine derivatives   | Q99720 | SIGMAR1 | TM7FS2 |
| CHEMBL1628227 | Non-selective monoamine reuptake inhibitor | Q99720 | SIGMAR1 | TM7FS2 |

**APP:** Amyloid-beta precursor protein; **PKM:** Pyruvate kinase; **HSD17B10:** 3-hydroxyacyl-CoA dehydrogenase type-2; **SIGMAR1:** Sigma non-opioid intracellular receptor 1; **GAPDH:** Glyceraldehyde 3-phosphate dehydrogenase; **PGK1:** Phosphoglycerate kinase 1; **EHHADH:** Peroxisomal bifunctional enzyme (Enoyl-CoA hydratase and 3-hydroxyacyl CoA dehydrogenase); **ACAA1:** 3-ketoacyl-CoA thiolase; **TM7FS2:** Delta(14)-sterol reductase.

**Table S4.** Metabolic Switches and natural ligands analyzed in the identification of druggable cavities.

Table S4 gives information about protein and ligand data employed in Sec. 2.1.3.

| Protein    |        |                                                                                                  |      |        |          |         |      | Natural Ligand                                                     |      |          |
|------------|--------|--------------------------------------------------------------------------------------------------|------|--------|----------|---------|------|--------------------------------------------------------------------|------|----------|
| UniProt ID | Symbol | Name                                                                                             | Type | ID PDB | Coverage | Quality | Code | Name                                                               | Type | PDB ID * |
| P00558     | PGK1   | <i>Phosphoglycerate kinase 1</i>                                                                 | Exp  | 2WZB   | 100%     | 1.5     | 3PG  | <i>3-phosphoglyceric acid</i>                                      | CC   | 2WZB     |
| P04406     | GAPDH  | <i>Glyceraldehyde-3-phosphate dehydrogenase</i>                                                  | Exp  | 3H9E   | 83%      | 1.7     | G3P  | <i>Glyceraldehyde-3-phosphate</i>                                  | P    | 3LC2-P   |
| Q08426     | EHHADH | <i>Peroxisomal bifunctional enzyme (Enoyl-CoA hydratase and 3-hydroxyacyl CoA dehydrogenase)</i> | AF   | -      | -        | -       | HSC  | <i>(s)-3-hydroxydecanoyl-coa</i>                                   | P    | 5OMO     |
| P09110     | ACAA1  | <i>3-ketoacyl-CoA thiolase, peroxisomal</i>                                                      | Exp  | 2IIK   | 93%      | 2.5     | CoA  | <i>Coenzyme A</i>                                                  | P    | 2WKV-B   |
| O76062     | TM7SF2 | <i>Delta(14)-sterol reductase</i>                                                                | AF   | -      | -        | -       | NDP  | <i>(NADPH) Dihydro-nicotinamide-adenine-dinucleotide phosphate</i> | P    | 4QUV     |

**CC:** Natural ligand co-crystallized in PDB; **P:** Natural ligand predicted by COACH-D.

\* PDB ID correspond to complex of the MSs with their natural ligand in PDB for CC and template complex for ligand-binding site prediction in COACH-D.

## Supplementary Material

**Table S5.** Enzymatic metabolic switches under PA (palmitic acid)-mediated cellular regulation.

| Reaction ID | Biological subsystem                                      | ID UniProt | Name                                                        | *Biological importance                                                                                                                                     |
|-------------|-----------------------------------------------------------|------------|-------------------------------------------------------------|------------------------------------------------------------------------------------------------------------------------------------------------------------|
| GHMT2r      | <i>Glycine, serine, alanine, and threonine metabolism</i> | P34896     | <i>Serine hydroxymethyltransferase</i>                      | Reaction associated with the polyglutamylation of folate. It is also fully and directionally coupled to purine, serine, alanine, and threonine metabolism. |
| r0735       | <i>Fatty acid oxidation</i>                               | Q9BY49     | <i>Peroxisomal trans-2-enoyl-CoA reductase</i>              | Fatty acid oxidation                                                                                                                                       |
| r0276       | <i>Purine catabolism</i>                                  | P36959     | <i>Guanosine monophosphate reductase</i>                    | catalyzes the NADPH-dependent deamination of guanosine monophosphate to inosinic acid                                                                      |
| r0276       | <i>Purine catabolism</i>                                  | Q9P2T1     | <i>Guanosine monophosphate reductase 2</i>                  | catalyzes the NADPH-dependent deamination of guanosine monophosphate to inosinic acid                                                                      |
| HMGCOASim   | <i>Cholesterol metabolism</i>                             | P54868     | <i>Hydroxymethylglutaryl-CoA synthase</i>                   | It catalyzes the reaction associated with the condensation of acetyl-CoA with acetoacetyl-CoA to form 3-hydroxy-3-methylglutaryl-CoA (HMG-CoA).            |
| PGK         | <i>Glycolysis/gluconeogenesis</i>                         | P00558     | <i>Phosphoglycerate kinase 1</i>                            | Catalysis of the reversible transfer of a phosphate group from 1,3-bisphosphoglycerate to ADP producing 3-phosphoglycerate and ATP                         |
| GAPD        | <i>Glycolysis/gluconeogenesis</i>                         | O14556     | <i>Glyceraldehyde-3-phosphate dehydrogenase</i>             | Catalysis of glyceraldehyde 3-phosphate to d-glycerate 1,3-bisphosphate                                                                                    |
| FTHFLm      | <i>Folate metabolism</i>                                  | P11586     | <i>C-1-tetrahydrofolate synthase, cytoplasmic</i>           | Formate-tetrahydrofolate ligase reaction, which participates in the transfer of carbon units, essential for several biosynthetic pathways.                 |
| GAPD        | <i>Glycolysis/gluconeogenesis</i>                         | P04406     | <i>Glyceraldehyde-3-phosphate dehydrogenase</i>             | catalysis of glyceraldehyde 3-phosphate to d-glycerate 1,3-bisphosphate                                                                                    |
| FAOXC16080x | <i>Fatty acid oxidation</i>                               | P09110     | <i>3-ketoacyl-CoA thiolase, peroxisomal</i>                 | $\beta$ -oxidation of long-chain acids                                                                                                                     |
| r0735       | <i>Fatty acid oxidation</i>                               | Q9BV79     | <i>Enoyl-[acyl-carrier-protein] reductase, mitochondria</i> | Fatty acid oxidation                                                                                                                                       |
| r0839       | <i>Transport, extracellular</i>                           | O76062     | <i>Delta(14)-sterol reductase TM7SF2</i>                    | Orotate transport (r0839) for the biosynthesis of RNA pyrimidines                                                                                          |
| PGK         | <i>Glycolysis/gluconeogenesis</i>                         | P07205     | <i>Phosphoglycerate kinase 2</i>                            | catalysis of the reversible transfer of a phosphate group from 1,3-bisphosphoglycerate to ADP producing 3-phosphoglycerate and ATP                         |

Supplementary Material

|             |                             |        |                                                                                                  |                                     |
|-------------|-----------------------------|--------|--------------------------------------------------------------------------------------------------|-------------------------------------|
| FAOXC16080x | <i>Fatty acid oxidation</i> | Q08426 | <i>Peroxisomal bifunctional enzyme (Enoyl-CoA hydratase and 3-hydroxyacyl CoA dehydrogenase)</i> | β-oxidation of long-chain acids     |
| FAOXC8C6x   | <i>Fatty acid oxidation</i> | P51659 | <i>Peroxisomal multifunctional enzyme type 2</i>                                                 | β-oxidation of fatty acids C8- > C6 |
| FAOXC6C4x   | <i>Fatty acid oxidation</i> | Q15067 | <i>Peroxisomal acyl-coenzyme A oxidase 1</i>                                                     | β-oxidation of fatty acids C6- > C4 |

---
